# Supplementary material for: Mitochondrial TSPO Deficiency Triggers Retrograde Signaling in MA-10 Mouse Tumor Leydig Cells
Source: MDPI journal article supplement (doi:10.3390/ijms22010252), 2020-12-29
Supplement: s1 [file s1]

**Table S3. Transcription factors (TFs) affected by the loss of TSPO.**

| Up-regulated | Down-regulated |
|--------------|----------------|
| Aire         | Arid5b         |
| Arnt         | Arntl          |
| Ascl2        | Barx2          |
| Bach2        | Batf           |
| Barx1        | Clock          |
| Batf3        | Crem           |
| Cdx1         | Crx            |
| Cdx2         | <b>Egr1</b>    |
| Cebpe        | <b>Egr3</b>    |
| Cux2         | Etv2           |
| Dlx3         | Etv4           |
| Egr4         | Etv5           |
| Ehf          | Fli1           |
| Elf2         | <b>Fosb</b>    |
| Elf3         | <b>Fosl1</b>   |
| Elf5         | Foxa3          |
| Esrrg        | Gata5          |
| Ets2         | Gli1           |
| Foxa2        | Hes1           |
| Foxp2        | Hnf1b          |
| Foxp3        | Hoxa13         |
| Gata1        | Irf7           |
| Gfi1b        | Klf4           |
| Gli2         | Maf            |
| Gli3         | Mafb           |
| Glis3        | Nfya           |
| Grhl2        | Nkx2           |
| Hesx1        | Nobox          |
| Hey2         | Nr1d2          |
| Hmga2        | Nr1h4          |
| Hnf4a        | Nr4a3          |
| Hoxa5        | Olig2          |
| Hoxa7        | Onecut2        |
| Hoxb6        | Ovol2          |
| Hoxd10       | Pax2           |
| Hoxd13       | Pbx1           |
| Insm1        | Plag1          |
| <b>Irf8</b>  | Pou6f1         |
| Klf1         | Prdm9          |
| <b>Klf15</b> | Prrx2          |
| Klf5         | Rarb           |
| Lef1         | Rfx2           |
| Mecom        | Runx1          |
| Mef2a        | Runx2          |

|              |       |
|--------------|-------|
| Meis1        | Sox4  |
| Msgn1        | Taf1  |
| Msx3         | Tal1  |
| Myb          | Tbp   |
| Myog         | Tgif1 |
| Nanog        |       |
| Neurog2      |       |
| Nfatc4       |       |
| Nfe2         |       |
| <b>Nfkb1</b> |       |
| Nkx3         |       |
| Nkx6         |       |
| Nr1d1        |       |
| Nr1i2        |       |
| Nr2f1        |       |
| Nr2f2        |       |
| Nr3c2        |       |
| Nr5a2        |       |
| Otx1         |       |
| Pou1f1       |       |
| Pou2f1       |       |
| Prdm14       |       |
| Prdm16       |       |
| Prop1        |       |
| Prrx1        |       |
| Relb         |       |
| Rfx3         |       |
| Runx3        |       |
| Rxrg         |       |
| Snai2        |       |
| Sox10        |       |
| Sox17        |       |
| Sox3         |       |
| Sox5         |       |
| Sox9         |       |
| Sp4          |       |
| Sp5          |       |
| Sp7          |       |
| <b>Stat4</b> |       |
| Tbx21        |       |
| Tcf7         |       |
| Tcf7l1       |       |
| Tlx1         |       |
| Wt1          |       |
| Zfp57        |       |
| Zic3         |       |

---

---

\*the same family of TFs has been validated using real-time PCR or highlighted in the Fig S6 (Red, up-regulated; green, down-regulated)
