# Supplementary material for: Mitochondrial TSPO Deficiency Triggers Retrograde Signaling in MA-10 Mouse Tumor Leydig Cells
Source: MDPI journal article supplement (doi:10.3390/ijms22010252), 2020-12-29
Supplement: s1 [file s1]

**Table S1.**Up-regulated mRNA expression from *Tspo* mutant MA-10 cells.

1110002E22Rik  
1110012J17Rik  
1200009I06Rik  
1300017J02Rik  
1600010F14Rik  
1600029D21Rik  
1700001L19Rik  
1700019N12Rik  
1700024P03Rik  
1700026D11Rik  
1700027D21Rik  
1700028E10Rik  
1700030F18Rik  
1700034P13Rik  
1700037F24Rik  
1700054N08Rik  
1700057G04Rik  
1810024B03Rik  
2010012P19Rik  
2010015L04Rik  
2210010C17Rik  
2310005A03Rik  
2310016G11Rik  
2310042D19Rik  
2400009B08Rik  
2610028H24Rik  
2610035D17Rik  
2610203C22Rik  
2610316D01Rik  
2810405K02Rik  
3110099E03Rik  
4632428N05Rik  
4731419I09Rik  
4921517L17Rik  
4921530D09Rik  
4930405P13Rik  
4930407I10Rik  
4930415O20Rik  
4930417G10Rik  
4930428E23Rik  
4930430D24Rik  
4930432E11Rik  
4930432M17Rik  
4930448H16Rik  
4930455H04Rik  
4930469G21Rik

4930473A06Rik  
4930479D17Rik  
4930480G23Rik  
4930502E18Rik  
4930503E14Rik  
4930505K14Rik  
4930511F01Rik  
4930511I11Rik  
4930513O06Rik  
4930558K02Rik  
4930570N18Rik  
4930583H14Rik  
4930588K23Rik  
4930595D18Rik  
4930598A11Rik  
4931413I07Rik  
4932412H11Rik  
4933400A11Rik  
4933403G14Rik  
4933405D12Rik  
4933407P14Rik  
4933413G19Rik  
4933422H20Rik  
4933426D04Rik  
4933432B09Rik  
4933433C11Rik  
5330437I02Rik  
5330439K02Rik  
5430402O13Rik  
5730419I09Rik  
5830416P10Rik  
6030469F06Rik  
6030471H07Rik  
6330403K07Rik  
6530402F18Rik  
8430403D17Rik  
8430427H17Rik  
8430429K09Rik  
9030617O03Rik  
9030624J02Rik  
9130017N09Rik  
9130204K15Rik  
9230116N13Rik  
9330154K18Rik  
9330159F19Rik  
9430065F17Rik  
9530003J23Rik

9830144P21Rik  
9930013L23Rik  
A130010J15Rik  
A230052G05Rik  
A230083N12Rik  
A330049M08Rik  
A330050B17Rik  
A3galt2  
A430010J10Rik  
A430033K04Rik  
A430078G23Rik  
A430093F15Rik  
A430110N23Rik  
A530040E14Rik  
A530076I17Rik  
A630014C17Rik  
A730036I17Rik  
A730085A09Rik  
A830018L16Rik  
A830036E02Rik  
A930007I19Rik  
A930029G22Rik  
AA467197  
AI182371  
AI427809  
AI428936  
AI836003  
Abat  
Abca4  
Abcb4  
Abhd14b  
Abi3bp  
Acaa1b  
Ace2  
Acmsd  
Acot12  
Acot3  
Acot5  
Acp5  
Acrbp  
Acsn3  
Acss3  
Actc1  
Actl6b  
Actl9  
Actn2  
Actn3

Acvrl1  
Adam15  
Adam19  
Adam33  
Adap2  
Adcy1  
Adcy10  
Adcy5  
Adcy7  
Adh4  
Adh6  
Adm2  
Adora3  
Adprhl1  
Aebp2  
Afap1l1  
Afap1l2  
Aff3  
Agbl2  
Agt  
Agtpbp1  
Aif1  
Aifm2  
Aim2  
Aire  
Ak5  
Akap6  
Akna  
Aldh3a1  
Alox15  
Alpl  
Amh  
Amotl1  
Ampd1  
Ampd3  
Amt  
Amtn  
Amz1  
Angel1  
Ank3  
Ankmy1  
Ankrd6  
Ano7  
Ano9  
Anxa9  
Aox4  
Ap1m2

Apobec3  
Apol9b  
Aqp9  
Arg2  
Arhgap33  
Arhgap4  
Arhgap40  
Arhgef10  
Arhgef10l  
Arl5c  
Arpm1  
Arrdc1  
Arrdc5  
Arsg  
Art1  
Art5  
Arvcf  
Asb16  
Asb2  
Asnsd1  
Asprv1  
Atoh8  
Atp1a2  
Atp2b4  
Atp7a  
Atp9a  
Atxn7l1  
Avil  
B930007M17Rik  
BC018473  
BC024582  
BC035044  
BC039771  
BC051019  
BC052486  
BC060267  
BC061194  
Bach2  
Basp1  
Batf2  
Bbs1  
Bbs12  
Bcorl1  
Best1  
Bglap  
Bicc1  
Bmper

Bpifb1  
Bpifb5  
Bpifb9a  
Brsk1  
Btn2a2  
Bzrap1  
C030005K06Rik  
C030019I05Rik  
C130026I21Rik  
C1qtnf3  
C1qtnf5  
C230014O12Rik  
C330021F23Rik  
C530008M17Rik  
C530028O21Rik  
Cabp4  
Cacna1d  
Cacna1e  
Cacna1g  
Cacna1i  
Cadps2  
Calcoco2  
Calr4  
Caly  
Camk2a  
Camsap3  
Camta1  
Capn11  
Capn12  
Capn5  
Capn8  
Capn9  
Car5a  
Car6  
Car7  
Card14  
Card9  
Casp1  
Casp4  
Casq1  
Ccbl1  
Ccbp2  
Ccadc103  
Ccadc125  
Ccadc13  
Ccadc146  
Ccadc33

Ccdc48  
Ccdc85a  
Ccdc87  
Ccdc88c  
Ccdc92  
Ccr7  
Cct6b  
Cd180  
Cd209c  
Cd209f  
Cd209g  
Cd247  
Cd5  
Cd74  
Cd79a  
Cd80  
Cdc42ep3  
Cdcp1  
Cdh19  
Cdh22  
Cdk15  
Ceacam10  
Ceacam16  
Ceacam19  
Ceacam3  
Cebpe  
Celsr2  
Cend1  
Ces4a  
Chmp4c  
Chrn2  
Chrne  
Chst12  
Ciita  
Cish  
Ckmt1  
Cldn10  
Cldn2  
Cldn27  
Clip3  
Clmn  
Clps  
Clta  
Cmklr1  
Cmtm2a  
Cnih2  
Cntfr

Cntnap5b  
Col11a2  
Col1a1  
Col2a1  
Col3a1  
Col4a2  
Col5a2  
Col6a2  
Col6a4  
Cox6a2  
Cox7b2  
Cpsf4l  
Cr2  
Crb1  
Crb2  
Creb3l3  
Crocc  
Crxos1  
Crygd  
Cryge  
Csrp1  
Cst13  
Cstl1  
Ctsf  
Cux2  
Cuzd1  
Cx3cl1  
Cxx1c  
Cyfip2  
Cyp2t4  
Cyp3a13  
Cys1  
D030055H07Rik  
D130043K22Rik  
D430040D24Rik  
D630032N06Rik  
D630042P16Rik  
D6Mm5e  
D730039F16Rik  
D730045A05Rik  
D930007P13Rik  
Dab2ip  
Dbn1  
Dcdc2a  
Dcp1b  
Dcst1  
Ddx25



Def6  
Defb42  
Dennd2d  
Dennd4b  
Dgat2  
Dhrs9  
Disp2  
Dlx2  
Dmrtc1a  
Dmrtc2  
Dnahc10  
Dnaja4  
Dnajb4  
Dnase1l2  
Dnase1l3  
Dnhd1  
Dnmt3l  
Dock2  
Dock4  
Dok2  
Dok3  
Dpep1  
Dpep2  
Dpp4  
Dppa2  
Dpy19l1  
Dsc1  
Dsg1a  
Dst  
Dtx1  
Dusp22  
Dusp27  
Dux  
Dyrk4  
Dzip1l  
E030010N08Rik  
E030025P04Rik  
E130018N17Rik  
E230008N13Rik  
Eci3  
Efna4  
Efnb3  
Efs  
Egfl6  
Ehf  
Elf3  
Elfn2

Elmod3  
Emb  
Emid1  
Emid2  
Emilin1  
Eml5  
Endou  
Eng  
Eno4  
Entpd1  
Entpd2  
Epb4.9  
Epha4  
Ermap  
Ern2  
Erv3  
Evx2  
Exoc3l2  
F13b  
F730035M05Rik  
F830208F22Rik  
Fa2h  
Faim2  
Fam107b  
Fam129c  
Fam163b  
Fam169b  
Fam178b  
Fam187a  
Fam189b  
Fam196b  
Fam198a  
Fam24a  
Fam65c  
Fam69c  
Fam70b  
Fam71d  
Fam71f1  
Fam71f2  
Fam73a  
Fam78a  
Fam83a  
Fam83c  
Fam83f  
Fam83h  
Fap  
Farp1

Fat3  
Fbln5  
Fbxl13  
Fbxl2  
Fbxo15  
Fbxo24  
Fcamr  
Fcer1g  
Fcgr1  
Fcgr2b  
Fermt1  
Fgd3  
Fgd5  
Fgf21  
Fgf9  
Fgfr1  
Fgfr3  
Fgr  
Fhl1  
Fmnl1  
Fmnl3  
Fmr1nb  
Fndc7  
Folr1  
Foxf1a  
Frmd4a  
Frmd7  
Fry  
Fscn1  
Fstl1  
Fut1  
Fxyd7  
G530011O06Rik  
Gabrr1  
Gal3st4  
Garnl3  
Gas1  
Gata2  
Gbg1  
Gcat  
Gdf5  
Gdpc3  
Gfap  
Gfi1b  
Gfod2  
Gfra2  
Gfra4

Ggh  
Ggt6  
Gh  
Ghr  
Gimap6  
Gipc2  
Gja8  
Gk5  
Glis1  
Glra4  
Gm10109  
Gm10134  
Gm10253  
Gm10258  
Gm10354  
Gm10373  
Gm10433  
Gm10474  
Gm10517  
Gm10575  
Gm10606  
Gm10660  
Gm10715  
Gm10716  
Gm10717  
Gm10718  
Gm10719  
Gm10722  
Gm10731  
Gm10800  
Gm10801  
Gm10804  
Gm10982  
Gm11019  
Gm1110  
Gm11167  
Gm11292  
Gm11415  
Gm11437  
Gm11525  
Gm11532  
Gm11616  
Gm11635  
Gm11683  
Gm11716  
Gm11730  
Gm11884

Gm12052  
Gm12056  
Gm12150  
Gm12153  
Gm12199  
Gm12228  
Gm12280  
Gm12405  
Gm12473  
Gm12511  
Gm12798  
Gm12976  
Gm12992  
Gm13032  
Gm1305  
Gm13054  
Gm13078  
Gm13083  
Gm13090  
Gm13101  
Gm13203  
Gm13227  
Gm13235  
Gm13242  
Gm13334  
Gm13373  
Gm13387  
Gm13404  
Gm13562  
Gm13660  
Gm13752  
Gm13778  
Gm13782  
Gm13783  
Gm13807  
Gm13830  
Gm13842  
Gm13869  
Gm13872  
Gm13874  
Gm13943  
Gm14002  
Gm14019  
Gm14025  
Gm14047  
Gm14102  
Gm14280

Gm14302  
Gm14319  
Gm14320  
Gm14391  
Gm14486  
Gm14597  
Gm14641  
Gm14703  
Gm14820  
Gm15070  
Gm15135  
Gm15348  
Gm15398  
Gm15418  
Gm15419  
Gm15518  
Gm15523  
Gm15525  
Gm15541  
Gm15548  
Gm15582  
Gm15612  
Gm15614  
Gm15640  
Gm1568  
Gm15729  
Gm15759  
Gm15775  
Gm15788  
Gm15856  
Gm15894  
Gm15958  
Gm16022  
Gm16028  
Gm16029  
Gm16031  
Gm16130  
Gm16150  
Gm16183  
Gm16191  
Gm16214  
Gm16240  
Gm16267  
Gm16306  
Gm16320  
Gm16321  
Gm16333

Gm16343  
Gm16506  
Gm16532  
Gm16565  
Gm16576  
Gm16628  
Gm16630  
Gm16743  
Gm16831  
Gm16869  
Gm16956  
Gm16994  
Gm17019  
Gm17033  
Gm17041  
Gm17067  
Gm17106  
Gm17135  
Gm17189  
Gm17359  
Gm17370  
Gm17445  
Gm17509  
Gm17535  
Gm17589  
Gm17623  
Gm17673  
Gm17718  
Gm17728  
Gm19980  
Gm20489  
Gm216  
Gm2381  
Gm3892  
Gm3940  
Gm4181  
Gm4221  
Gm4262  
Gm4419  
Gm4694  
Gm4794  
Gm4795  
Gm4846  
Gm4956  
Gm4963  
Gm5089  
Gm514

Gm5415  
Gm5475  
Gm5624  
Gm5699  
Gm5897  
Gm6133  
Gm6288  
Gm648  
Gm6484  
Gm6526  
Gm6772  
Gm684  
Gm6871  
Gm70  
Gm711  
Gm7489  
Gm7714  
Gm805  
Gm8126  
Gm8247  
Gm8439  
Gm9725  
Gm9732  
Gm9873  
Gm9918  
Gm9920  
Gm9953  
Gm9989  
Gmpr  
Gnal  
Gnaz  
Gngt2  
Gp6  
Gpa33  
Gpc3  
Gpnmb  
Gpr133  
Gpr150  
Gpr157  
Gpr158  
Gpr160  
Gpr17  
Gpr20  
Gpr56  
Gpsm3  
Greb1l  
Grhl2



Grid2ip  
Grin1  
Grin2c  
Grip2  
Grrp1  
Gucy2g  
Gypa  
H1foo  
H2afy  
H2afy2  
Hapln3  
Hapln4  
Has2  
Hck  
Hcls1  
Hcrt  
Hdac7  
Hdgfrp3  
Heatr7b1  
Hecw2  
Hemt1  
Hipk4  
Hmcn2  
Hnf4a  
Hnrnpf  
Hoxa3  
Hoxa7  
Hoxb3  
Hoxb3os  
Hrh3  
Hrk  
Hs3st1  
Hsd11b1  
Hsd17b3  
Hsf5  
Hspb2  
Hspb8  
Htr1f  
Htra1  
Htra3  
Hunk  
Hvcn1  
Icam2  
Ifi203  
Ifi27l2b  
Ifitm1  
Ifitm7

lflt1d1  
lgdccc3  
lgf1  
lgfbp4  
lgfbp5  
lgfn1  
lgsf8  
lkzf3  
ll12rb1  
ll15  
ll15ra  
ll17f  
ll17re  
ll1a  
ll1b  
ll1rap  
ll28a  
ll2rg  
ll31ra  
ll34  
lmpg2  
lnadl  
lnhbb  
lnhbc  
lrak2  
lrf6  
lrf8  
lrs2  
lsl2  
lslr2  
ltga10  
ltga11  
ltga7  
ltgad  
ltgae  
ltgax  
ltgb1bp3  
ltgb4  
ltgb8  
lyd  
Jag2  
Kazn  
Kbtbd12  
Kcna1  
Kcnab2  
Kcnb1  
Kcne2

Kcng4  
Kcnh4  
Kcnip2  
Kcnj10  
Kcnk15  
Kcnk4  
Kcnk7  
Kcnn1  
Kcnn2  
Kcnn4  
Kcnq4  
Kcns3  
Kcp  
Kdm2b  
Kdm5b  
Kif9  
Kiss1  
Klb  
Klc3  
Klf1  
Klf15  
Klhdc8a  
Klhl10  
Klhl32  
Klk1  
Klk15  
Klk1b1  
Klk1b16  
Klk1b21  
Klk1b22  
Klk1b24  
Klk1b26  
Klk1b27  
Klk1b3  
Klk1b4  
Klk1b5  
Klk1b8  
Klrb1c  
Krt23  
Krt78  
Krt82  
L1cam  
L3mbtl1  
Lag3  
Lair1  
Lama2  
Lamb3

Lasp1  
Lbx2  
Lcn2  
Ldha  
Ldhc  
Lefty1  
Lgals3bp  
Lgals4  
Lgals7  
Lgals9  
Lifr  
Limk2  
Lims2  
Lipk  
Lmo1  
Lmod1  
Lmtk3  
Loxl4  
Lpar5  
Lpin1  
Lrfn3  
Lrguk  
Lrrc48  
Lrrc4b  
Lrrc50  
Lrrc61  
Lrrc67  
Lrrc7  
Lrrc8a  
Lrrc8d  
Lsamp  
Luzp4  
Ly6g5c  
Ly86  
Lypd4  
Lym7  
MacroD2  
Magea10  
Mageb2  
Mamdc2  
Maml2  
Manba  
Mapt  
Mast1  
Mbd3l2  
Mbp  
Mcart6

Mcf2l  
Mettl11b  
Mettl21a  
Mfap2  
Mfap3l  
Mfap5  
Mfhas1  
Mfi2  
Mfrp  
Mfsd2a  
Mgll  
Micalcl  
Mid1ip1  
Miox  
Mlc1  
Mmp28  
Mmp9  
Mogat2  
Mospd4  
Mprip  
Mpv17l  
Mras  
Msgn1  
Mst1  
Mtl5  
Mtus2  
Muc15  
Mybpc1  
Myh11  
Mylk  
Myo15b  
Myo18a  
Myo1g  
Myo1h  
Myo5c  
Myoz1  
Mypn  
Naalad2  
Nacc2  
Naip1  
Nanos3  
Nbeal2  
Ncf1  
Nctc1  
Nedd4l  
Neurl1a  
Nfatc4

Nfe2  
Nfe2l3  
Nhedc1  
Nhlh1  
Ninj2  
Nlgn3  
Nlrp12  
Nlrp4f  
Nod1  
Nova1  
Nox1  
Nphs1  
Nppc  
Npr2  
Nr1i2  
Nr1i3  
Nr2f2  
Nrap  
Nrg4  
Nrip2  
Nrp2  
Nrxn2  
Nt5c3l  
Ntn5  
Ntng2  
Nup210l  
Nxn1  
Nyx  
Oas3  
Ocln  
Odf3b  
Odz4  
Olfr1  
Olfr1029  
Olfr1030  
Olfr18  
Olfr287  
Olfr39  
Olfr750  
Olfr872  
Olfr873  
Omp  
Onecut3  
Opr1  
Orai2  
Orm1  
Orm2

Osbp110  
Otoa  
Otop1  
Otop2  
Otos  
Otub2  
Ovol1  
P2rx1  
P2rx6  
P2rx7  
P2ry6  
Padi4  
Pah  
Pak6  
Palld  
Palmd  
Pam  
Panx2  
Papss2  
Paqr5  
Pate2  
Patz1  
Pcdh10  
Pcdhb1  
Pcdhb2  
Pcdhb3  
Pcdhb5  
Pcnxl2  
Pcsk6  
Pde11a  
Pde2a  
Pde6g  
Pde6h  
Pdgfa  
Pdgfra  
Pdgfrb  
Pdzd3  
Pdzd4  
Pdzd7  
Pecam1  
Pemt  
Pet2  
Pex26  
Pfn4  
Pgl  
Phf23  
Phkg1

Phxr4  
Phyhd1  
Pi15  
Pik3c2b  
Pik3ip1  
Pilrb1  
Pilrb2  
Pion  
Pitpnm3  
Pkd2l2  
Pla1a  
Pla2g10  
Pla2g1b  
Pla2g2e  
Pla2g3  
Pla2g4b  
Plat  
Plb1  
Plcd4  
Plch1  
Plch2  
Plekhhb1  
Plekhg1  
Plk5  
Plp1  
Plxna4  
Pmaip1  
Pmel  
Pmfbp1  
Pnp2  
Podxl2  
Popdc2  
Pparg  
Ppef1  
Ppef2  
Ppfia4  
Ppfibp2  
Ppip5k1  
Ppp1r13b  
Ppp1r1b  
Ppp2r2c  
Ppp3ca  
Pramef6  
Prex1  
Prkab2  
Prkar1b  
Prkcc



Prkcz  
Prnd  
Proca1  
Prodh  
Prr13  
Prr15l  
Prr19  
Prrx1  
Prss32  
Prss35  
Prss36  
Prss57  
Prx  
Psd  
Psd2  
Psd4  
Psg16  
Psg29  
Psma8  
Pstpip1  
Ptch2  
Ptgds  
Ptgfr  
Ptgir  
Pth1r  
Ptpr  
Ptpru  
Pvrl4  
Pydc4  
Pzp  
RP23  
RP24  
Rab20  
Rab25  
Rap1gap  
Rasl11b  
Rassf5  
Rbms3  
Rbpjl  
Rdh12  
Rdh16  
Rdm1  
Reln  
Reps2  
Rfx4  
Rgag1  
Rgs3

Rgs5  
Rhbg  
Rhox2a  
Rhox2d  
Rhox2h  
Rin1  
Ripply1  
Rnase10  
Rnase1  
Rnf114  
Rnf123  
Rnf135  
Rnf26  
Rnf43  
Robo2  
Rph3a1  
Rps6ka1  
Rsph10b2  
Rsph6a  
Ryr2  
Ryr3  
S100a16  
S100a4  
S100g  
S1pr1  
Samd4  
Sash1  
Satb1  
Scarf1  
Scrn1  
Sebox  
Sec14l2  
Sec14l4  
Sec14l5  
Sema3g  
Sema5b  
Serpina7  
Serpina8  
Serpina1  
Serpina1  
Sfpi1  
Sgca  
Sh2d6  
Sh3gl3  
Sh3kbp1  
Sh3pxd2a  
Sh3rf2

Shisa4  
Shisa7  
Shroom4  
Siglec1  
Siglece  
Sim1  
Slc11a1  
Slc11a2  
Slc14a1  
Slc14a2  
Slc15a3  
Slc16a12  
Slc16a4  
Slc17a7  
Slc18a1  
Slc1a2  
Slc1a7  
Slc23a3  
Slc25a45  
Slc26a3  
Slc28a1  
Slc2a6  
Slc38a11  
Slc39a11  
Slc39a5  
Slc43a2  
Slc47a2  
Slc4a10  
Slc4a9  
Slc6a4  
Slc7a14  
Slc7a7  
Slc9a3  
Slco2b1  
Slfn2  
Slurp1  
Smad6  
Smagp  
Snap91  
Snhg11  
Soat2  
Socs1  
Sod3  
Sorl1  
Sort1  
Sox13  
Sox6

Sp1  
Sp6  
Spaca3  
Spata21  
Spata7  
Spdyb  
Speer4c  
Speer4d  
Speer7  
Spg7  
Spib  
Spink8  
Spinlw1  
Spint2  
Sbnb3  
Sbnb5  
Spock2  
Spon1  
Sprr2a1  
Src  
Srcin1  
Srgap3  
Sspo  
St6galnac1  
Stap2  
Stat5a  
Stbd1  
Stc1  
Stk32b  
Stx1b  
Stxbp2  
Styxl1  
Sulf1  
Sulf2  
Sult5a1  
Sult6b1  
Susd4  
Sv2c  
Sybu  
Sycp3  
Syn1  
Syne1  
Syt7  
Sytl4  
Tac2  
Taf6  
Tanc1

Tbc1d10c  
Tbc1d21  
Tbc1d30  
Tbkbp1  
Tbx10  
Tbxas1  
Tcam1  
Tceanc  
Tdo2  
Tdrd9  
Tead4  
Tex13a  
Tex14  
Tfpi  
Tg  
Tgm3  
Tgm4  
Thrsp  
Thsd7a  
Thsd7b  
Tjp2  
Tktl1  
Tlr7  
Tm6sf2  
Tmc3  
Tmeff2  
Tmem132b  
Tmem139  
Tmem140  
Tmem156  
Tmem176b  
Tmem179  
Tmem190  
Tmem216  
Tmem229b  
Tmem29  
Tmem37  
Tmem38b  
Tmem44  
Tmem56  
Tmem61  
Tmem79  
Tmem92  
Tmod4  
Tmprss6  
Tnfrsf13c  
Tnfrsf17

Tnfrsf25  
Tnfrsf26  
Tnk2  
Tnni1  
Tnnt1  
Tnxb  
Tomm20l  
Tpd52  
Tprg  
Traf5  
Trim21  
Trim30a  
Trim30d  
Trim34a  
Trim38  
Trim40  
Trim43b  
Trim66  
Trpm5  
Trpv2  
Tsix  
Tspan10  
Tspan18  
Tspan32  
Tspan9  
Ttc16  
Ttc21a  
Ttll13  
Tuba3b  
Tuba8  
Tulp1  
Tulp2  
Txlnb  
Ube2l3  
Ube2l6  
Ucp3  
Uggt2  
Ugt1a6a  
Ugt1a6b  
Ugt1a7c  
Ugt2a3  
Unc119  
Unc13d  
Unc45b  
Unc80  
Ush1g  
Usp18

Usp46  
Usp54  
Vdr  
Vezt  
Vgl1  
Vmn1r4  
Vmn2r44  
Vmo1  
Vpreb3  
Vwa3a  
Wfdc3  
Wnk2  
Wnt5b  
Wnt7b  
Wnt8b  
Wnt9a  
Xaf1  
Xcr1  
Xirp1  
Xist  
Xkr5  
Xkrx  
Xlr4a  
Xpnpep2  
Xrra1  
Ybx2  
Yipf1  
Ysk4  
Zbtb32  
Zdhhc14  
Zdhhc19  
Zfp114  
Zfp133  
Zfp365  
Zfp366  
Zfp423  
Zfp454  
Zfp462  
Zfp518b  
Zfp534  
Zfp558  
Zfp580  
Zfp600  
Zfp658  
Zfp69  
Zfp786  
Zfp951

Zfyve28

Zic3

Zmynd10

Zscan4c

Zswim5

Zyg11a
