# Supplementary material for: Mitochondrial TSPO Deficiency Triggers Retrograde Signaling in MA-10 Mouse Tumor Leydig Cells
Source: MDPI journal article supplement (doi:10.3390/ijms22010252), 2020-12-29
Supplement: s1 [file s1]

**Table S2. Down-regulated mRNA expression from *Tspo* mutant MA-10 cells.**

1110035M17Rik  
1500009L16Rik  
1700003M07Rik  
1700008I05Rik  
1700011E24Rik  
1700011I03Rik  
1700016P03Rik  
1700026L06Rik  
1700049E15Rik  
1700061J23Rik  
1700112E06Rik  
1700113H08Rik  
2010305A19Rik  
2200002K05Rik  
2610034M16Rik  
2610109H07Rik  
2610206C17Rik  
2810403D21Rik  
3200002M19Rik  
3632451O06Rik  
4732465J04Rik  
4833427F10Rik  
4921504A21Rik  
4921528I01Rik  
4930426D05Rik  
4930480K15Rik  
4930511M11Rik  
4933430H15Rik  
5031410I06Rik  
5033411D12Rik  
5730420D15Rik  
6330439K17Rik  
6820408C15Rik  
9030025P20Rik  
9130230L23Rik  
A230005M16Rik  
A230059L01Rik  
A330040F15Rik  
A530098C11Rik  
AU019990  
Aarsd1  
Abcb9  
Abcc2  
Abcc9  
Abcg5  
Acat3

Acer2  
Acsbg2  
Acss1  
Actr3b  
Adarb1  
Adcyap1  
Aff2  
Agap2  
Agbl3  
Agbl5  
Agxt2  
Ahcyl2  
Ak8  
Aldh3b2  
Aldh8a1  
Aldob  
Alg13  
Alpk3  
Amdhd1  
Amot  
Ankrd2  
Ankrd35  
Ano1  
Ano3  
Anpep  
Apcdd1  
Apobec1  
Apoc3  
Apol8  
Arhgap22  
Arhgap28  
Arhgap44  
Arhgap9  
Arhgef40  
Arl11  
Art3  
Artn  
Asgr1  
Atat1  
Atg13  
Atp1a3  
Atp8b5  
Avpr1a  
B230314M03Rik  
BC016201  
BC021767  
BC023105

BC042782  
BC048594  
BC055111  
Baalc  
Bai2  
Bche  
Bean1  
Bmp2  
Bmpr1b  
Brdt  
Brsk2  
Btbd3  
Btbd9  
Btg2  
C1ql4  
C3  
C3ar1  
C430014B12Rik  
C4a  
C4b  
C630004H02Rik  
Cacna1h  
Cacna2d3  
Cacnb2  
Capn3  
Car1  
Car15  
Car5b  
Car8  
Caskin1  
Catsperg1  
Catsperg2  
Cblc  
Cbr2  
Cbs  
Ccadc148  
Ccadc154  
Ccadc162  
Ccadc37  
Ccadc38  
Ccadc64b  
Ccadc88b  
Cd109  
Cd22  
Cd244  
Cd34  
Cd7

Cda  
Cdh13  
Cdh16  
Cdh17  
Cdh9  
Cdk14  
Cdkl2  
Cdkl3  
Cdon  
Ceacam2  
Cela3b  
Celf3  
Celf6  
Cerkl  
Chchd6  
Chdh  
Chrd  
Chrm5  
Chrna4  
Cilp  
Cited4  
Clca1  
Clca3  
Clca5  
Clec11a  
Clec16a  
Clu  
Cndp1  
Cngb1  
Cnksr1  
Cntnap2  
Col11a1  
Col14a1  
Col16a1  
Col19a1  
Col22a1  
Col4a5  
Col4a6  
Col6a6  
Col7a1  
Cp  
Cpa6  
Cpe  
Cps1  
Cpt1c  
Creg1  
Crem

Crhr2  
Crim1  
Crisp1  
Crisp3  
Crispld2  
Crx  
Csf1r  
Csf2ra  
Csgalnact1  
Csmd1  
Csmd3  
Csn1s1  
Csnk1e  
Cyp11b1  
Cyp19a1  
Cyp1a1  
Cyp2c55  
Cyp2d11  
Cyp2f2  
D030054H15Rik  
D430001F17Rik  
D7Ertd443e  
Dchs1  
Dcx  
Ddah2  
Defb19  
Defb36  
Dennd3  
Des  
Dgkk  
Dlg4  
Dlgap1  
Dlgap4  
Dmd  
Dnahc2  
Dnahc3  
Dnahc5  
Dnahc6  
Dnahc9  
Dnm1  
Dpcr1  
Dpp6  
Dusp4  
Dydc2  
Dynlt1e  
E030011O05Rik  
E130114P18Rik

E330009J07Rik

Eaf2

Eda2r

Edil3

Edn1

Efcab4a

Efcab5

Efhb

Efhc1

Efr3b

Egr1

Egr2

Egr3

Elf5

Elk3

Enam

Enkur

Eno2

Entpd3

Etv4

Eya1

F5

Fabp2

Fah

Fam115c

Fam125b

Fam135b

Fam154b

Fam166b

Fam3c

Fam46a

Fam55d

Fam5c

Fank1

Fat2

Fblim1

Fbp1

Fbxl17

Fbxo2

Fcho1

Fez1

Fezf2

Fgf7

Flot1

Fmn2

Fosl1

Frmd4b

Frmpd1  
Fsip1  
Fstl5  
Gabrb2  
Gabrg1  
Gck  
Gcom1  
Gdf7  
Gem  
Ggt5  
Ggt7  
Gif  
Gipr  
Gli1  
Gm10220  
Gm10308  
Gm10471  
Gm10497  
Gm11127  
Gm11210  
Gm1123  
Gm1141  
Gm11754  
Gm12530  
Gm12860  
Gm12861  
Gm12865  
Gm12949  
Gm12963  
Gm13052  
Gm13070  
Gm13073  
Gm13096  
Gm13147  
Gm13154  
Gm13165  
Gm13225  
Gm13388  
Gm13522  
Gm13713  
Gm13762  
Gm13857  
Gm14074  
Gm14257  
Gm14341  
Gm14526  
Gm14978

Gm15396  
Gm15512  
Gm15639  
Gm15883  
Gm16043  
Gm16120  
Gm16140  
Gm16193  
Gm16212  
Gm16271  
Gm16548  
Gm16587  
Gm16702  
Gm1673  
Gm16799  
Gm16853  
Gm16962  
Gm17040  
Gm17120  
Gm17507  
Gm1979  
Gm20449  
Gm20481  
Gm20482  
Gm2155  
Gm239  
Gm3470  
Gm4461  
Gm4877  
Gm4889  
Gm4981  
Gm5432  
Gm5819  
Gm5830  
Gm5862  
Gm597  
Gm6034  
Gm6657  
Gm6996  
Gm7168  
Gm7347  
Gm7361  
Gm773  
Gm8258  
Gm830  
Gm88  
Gm973



Gm98  
Gm9930  
Gnb4  
Gnrhr  
Got1l1  
Gpr113  
Gpr115  
Gpr137c  
Gpr153  
Gpr182  
Gpr35  
Gpr55  
Grin2d  
Grinl1a  
Grk4  
Gstm3  
Gstm6  
Gsx2  
Hcrtr1  
Heph1  
Hfm1  
Hgfac  
Hivep3  
Hmgn3  
Hmox1  
Hnf1b  
Hoxc4  
Hs3st6  
Hsd3b1  
Hsf2bp  
Hspa1a  
Htr6  
Hyal1  
Ier3  
Iigp1  
Ikzf4  
Il17rb  
Il17rd  
Il28ra  
Il4ra  
Inpp5d  
Iqck  
Irak4  
Isg20  
Itga2  
Itga4  
Itga8

Jph2  
Jsrp1  
Kalrn  
Kcng3  
Kcnu1  
Kctd19  
Khdc1a  
Klf4  
Klhl14  
Klhl33  
Klrc1  
Krt81  
Krt86  
L3mbtl4  
Lama3  
Lama5  
Lamc3  
Lbp  
Ldb3  
Lepr  
Lhcgr  
Lhfpl1  
Lhfpl5  
Lingo2  
Lmo2  
Lrmp  
Lrp1  
Lrp8  
Lrpprc  
Lrrc26  
Lrrc55  
Lrrc6  
Ly6i  
Ly9  
Lypd1  
Lypd6  
Maff  
Magi2  
Mapk15  
Mapk8ip1  
Masp1  
Mat1a  
Mb  
Megf10  
Met  
Mfsd6  
Micall2

Mmp12  
Mmp13  
Mmp19  
Mmp27  
Mmp8  
Mpp2  
Mpp3  
Mrgprf  
Msln  
Msrbb3  
Mta3  
Mtap7d2  
Mthfd1l  
Mtmr1  
Mtmr11  
Muc1  
Myh7b  
Myo18b  
Myo7a  
Naip6  
Nalcn  
Nccrp1  
Ncf2  
Ncrna00086  
Neb  
Nedd9  
Nek10  
Neurl3  
Nhs  
Nkain2  
Nlrc3  
Nme5  
Nos1  
Notch3  
Notch4  
Npm2  
Nppb  
Nr4a3  
Nrd1  
Nrtn  
Nrxn1  
Nsd1  
Ntf5  
Nudt16  
Oasl2  
Ociad2  
Ogdhl

Olfr1000  
Olfr1006  
Olfr1012  
Olfr1013  
Olfr1014  
Olfr1213  
Olfr1246  
Olfr154  
Olfr370  
Olfr419  
Olfr456  
Olfr457  
Olfr853  
Olfr933  
Opn4  
Otop3  
P2rx2  
P2rx5  
P4htm  
Padi2  
Paqr6  
Paqr8  
Park2  
Parp14  
Pbx1  
Pde4c  
Pdlim5  
Pdxk  
Pebp4  
Pigk  
Pik3ap1  
Pitx3  
Piwil4  
Pla2g5  
Plac8  
Plau  
Plcxd1  
Plcxd3  
Pnma5  
Poc1b  
Podnl1  
Ppard  
Ppil6  
Ppp1r3g  
Pqlc1  
Prickle1  
Prl

Prl2c3  
Prl7a2  
Prl7b1  
Prl7d1  
Prlr  
Procr  
Prr9  
Prrg4  
Prrt1  
Prrt4  
Prss22  
Prss23  
Prss42  
Ptger4  
Ptplad2  
Ptpn5  
Ptpra  
Ptx4  
Rab15  
Rab40b  
Rac2  
Ramp1  
Rapgef3  
Rarres2  
Rasa3  
Rasgrf2  
Rasgrp4  
Rassf4  
Raver2  
Rbm20  
Rbm44  
Relb  
Rgs10  
Rgs13  
Rgs2  
Rgs9  
Rhov  
Rims1  
Rlbp1  
Rltpr  
Rnf157  
Rnf180  
Rnls  
Rnpep  
Robo1  
Robo3  
Rpgrip1

Rpl31  
Rpl3l  
Rps6ka2  
Rps6ka5  
Rsph9  
Rtkn2  
Runx2  
Ryr1  
Samd5  
Scamp1  
Scin  
Scn4a  
Sdc3  
Sdcbp  
Selp  
Sema3a  
Sema3d  
Sema3f  
Sema5a  
Sema6b  
Serpina6c  
Serpina6d  
Serpina9c  
Setd7  
Sez6  
Sftpc  
Sh2d3c  
Sh2d4b  
Sh3bgr  
Shc4  
Siglecg  
Sim2  
Skint3  
Slc12a2  
Slc22a18  
Slc23a1  
Slc26a5  
Slc2a9  
Slc30a1  
Slc35f4  
Slc39a2  
Slc4a4  
Slc4a5  
Slc5a8  
Slc6a9  
Slfnl1  
Snai1

Sntb1  
Snx24  
Socs2  
Spata13  
Spata18  
Specc1  
Speer4a  
Speer4b  
Speg  
Spic  
Spna1  
Spp1  
Spred3  
St14  
St18  
Stab2  
Steap1  
Steap3  
Stim2  
Stk36  
Stk40  
Styk1  
Susd1  
Susd2  
Sv2a  
Syng3  
Sytl1  
Sytl3  
Tagln  
Tas2r135  
Tbc1d14  
Tbc1d16  
Tceal8  
Tcp10b  
Tcte2  
Tead1  
Tec  
Tectl  
Tek4  
Tesc  
Tex12  
Tex15  
Tex19.1  
Tex19.2  
Tgm5  
Tgm6  
Tgs1

Thbs1  
Thbs2  
Thsd4  
Tiam2  
Tle2  
Tll2  
Tlr4  
Tmcc2  
Tmem119  
Tmem164  
Tmem173  
Tmem178  
Tmem181a  
Tmem184a  
Tmem22  
Tmem232  
Tmem40  
Tmem8b  
Tmprss11bnl  
Tmprss7  
Tmsb15b2  
Tmsb15l  
Tnfaip6  
Tnnt3  
Trcg1  
Trdn  
Trfr2  
Trim63  
Trim69  
Trim72  
Triobp  
Tro  
Trpa1  
Tspan17  
Ttc39c  
Ttl9  
Tubb2b  
Tulp4  
Uaca  
Uba7  
Ugdh  
Ugt2b36  
Ugt2b5  
Unc13b  
Vgl3  
Vill  
Vit



Vmn1r66  
Vmn2r13  
Vmn2r31  
Vmn2r33  
Vmn2r79  
Vmn2r97  
Vsnl1  
Vwa2  
Vwa5b2  
Wbscr27  
Wdr52  
Wisp2  
Wiz  
Xkr4  
Xkr9  
Xlr3a  
Xrcc4  
Zan  
Zbtb38  
Zdbf2  
Zdhhc9  
Zfp277  
Zfp300  
Zfp37  
Zfp516  
Zfr2
