# Supplementary material for: Mitochondrial TSPO Deficiency Triggers Retrograde Signaling in MA-10 Mouse Tumor Leydig Cells
Source: Int J Mol Sci. 2020 Dec 29;22(1):252. doi: 10.3390/ijms22010252 (PMC7795497; doi:10.3390/ijms22010252)
Supplement: Supplementary file 1 [file ijms-22-00252-s001.zip]

Archive with 4 entries (4 files):
- ijms-991545-supplementary-Figure.pdf
- ijms-991545-supplementary-Table S1.pdf
- ijms-991545-supplementary-Table S2.pdf
- ijms-991545-supplementary-Table-S3.pdf
